# Supplementary material for: 3-Hydroxycinnamic acid – a new central core for the design of bent-shaped liquid crystals
Source: Royal Society of Chemistry journal article supplement (doi:10.1039/c3tc30664j), 2013-01-01
Supplement: c3tc30664j.pdf [file c3tc30664j.pdf]

## Electronic supplementary information

### 3-Hydroxycinnamic acid - a new central core for the design of bent-shaped liquid crystals

Michal Kohout<sup>a</sup>, Jiří Tůma<sup>a</sup>, Jiří Svoboda<sup>a</sup>, Vladimíra Novotná<sup>\*b</sup>, Ewa Gorecka<sup>c</sup> and Damian Pocięcha<sup>c</sup>

<sup>a</sup> Department of Organic Chemistry, Institute of Chemical Technology Prague, Technická 5, CZ-166 28 Prague 6, Czech Republic. E-mail: [Jiri.Svoboda@vscht.cz](mailto:Jiri.Svoboda@vscht.cz); Fax: +420220444182; Tel: +420220444288

<sup>b</sup> Institute of Physics, The Academy of Sciences of the Czech Republic, Na Slovance 2, CZ-182 21 Prague 9, Czech Republic. E-mail: [novotna@fzu.cz](mailto:novotna@fzu.cz); Fax: +420286890527; Tel: +420266053111

<sup>c</sup> Laboratory of Dielectrics and Magnetics, Chemistry Department, Warsaw University, Al. Zwirki i Wigury 101, 02-089 Warsaw, Poland. E-mail: [pociu@chem.uw.edu.pl](mailto:pociu@chem.uw.edu.pl); Fax: +48228221075; Tel: +48228221075

## S1. Synthesis

### S1.1 General

Structures of intermediates and final products were confirmed by <sup>1</sup>H NMR spectroscopy (Varian Gemini 300 HC instrument), deuteriochloroform was used as solvent and signals of the solvent served as internal standard, *J* values are given in Hz. Elemental analyses were carried out on a Perkin-Elmer 2400 instrument. Purity of all final compounds was confirmed by HPLC analysis (Tessek C18 25x4.5 RP column) and found >99.8%. Column chromatography was carried out using Merck Kieselgel 60 (60-100 μm). The experimental part summarizes general synthetic procedures for the preparation of intermediates **1** and **3-5** and the target compounds of the series **I**, **II** and **III**.

### S1.2 Synthesis of intermediates

#### 3-*tert*-Butyl(dimethyl)silyloxycinnamic acid (**1**)

To a solution of 3-hydroxycinnamic acid (4.0 g; 24.4 mmol) and imidazole (3.4 g; 48.8 mmol) in dry DMF (45 ml), a solution of *tert*-butyl(dimethyl)silyl chloride in dry DMF (12 ml) was added dropwise. The reaction mixture was stirred at 60 °C for 9 h and then poured in cold aq. 1 M HCl (100 ml). The solution was extracted with ethyl acetate (3 × 75 ml), the combined organic solution was washed with aq. 6 M HCl (3 × 60 ml), water (2 × 60 ml) and dried with anhydrous magnesium sulphate. The solvent was evaporated and the crude product was crystallized from toluene to yield 5.3 g (78%) of acid **1**, m.p. 114-117 °C. <sup>1</sup>H NMR (DMSO-*d*<sub>6</sub>): 0.18 (s, 6 H, (CH<sub>3</sub>)<sub>2</sub>Si), 0.94 (s, 9 H, (CH<sub>3</sub>)<sub>3</sub>SiC), 6.48 (d, 1 H, *J* = 15.8, CH=CHCOO), 6.88 (m, 1 H, H-4), 7.12 (s, 1 H, H-2), 7.27 (m, 2 H, H-5, H-6), 7.52 (d, 1 H, *J* = 15.8,

CH=CH-COO), 12.37 (bs, 1 H, COOH). Elemental analysis: for C<sub>15</sub>H<sub>22</sub>O<sub>3</sub>Si (278.43), calculated C 64.71, H 7.96; found C 64.65, H 8.02%.

#### 4-Alkyloxyphenyl 4-[(3-(tert-butyl(dimethyl)silyloxy)cinnamoyl)oxy]benzoate (3A-D)

To a solution of acid **1** (1.50 mmol), hydroxy ester **2A-D** (1.53 mmol) and catalytic amount of DMAP (0.05 g) in dry dichloromethane (30 ml), DCC (0.32 g; 1.56 mmol) was added in one portion and the reaction mixture was stirred in the argon atmosphere for 3 h. The precipitate was filtered and the filtrate evaporated. The crude product was purified by column chromatography (hexane/ethyl acetate, 8/1).

*4-Octyloxyphenyl 4-[(3-(tert-butyl(dimethyl)silyloxy)cinnamoyl)oxy]benzoate (3A)*. Yield 91%, m.p. 78-79.5 °C. <sup>1</sup>H NMR: 0.23 (s, 6 H, (CH<sub>3</sub>)<sub>2</sub>Si), 0.91 (t, 3 H, *J* = 6.9, CH<sub>3</sub>), 1.01 (s, 9 H, (CH<sub>3</sub>)<sub>3</sub>Si), 1.22-1.40 (m, 8 H, (CH<sub>2</sub>)<sub>4</sub>), 1.46 (m, 2 H, CH<sub>2</sub>), 1.79 (m, 2 H, CH<sub>2</sub>), 3.96 (t, 3 H, *J* = 6.7, OCH<sub>2</sub>), 6.59 (d, 1 H, *J* = 16.1, CH=CHCOO), 6.93 (m, 3 H, 2 H, H-4), 7.06 (t, 1 H, *J* = 2.1, H-2), 7.11 (d, 2 H, *J* = 9.1), 7.20 (d, 1 H, *J* = 7.9, H-6), 7.30 (d, 1 H, *J* = 7.9, H-5), 7.32 (d, 2 H, *J* = 8.8), 7.53 (d, 1 H, *J* = 16.1, CH=CHCOO), 8.26 (d, 2 H, *J* = 8.8). Elemental analysis: for C<sub>36</sub>H<sub>46</sub>O<sub>6</sub>Si (602.85), calculated C 71.73, H 7.69; found C 71.73, H 7.64%.

*4-Decyloxyphenyl 4-[(3-(tert-butyl(dimethyl)silyloxy)cinnamoyl)oxy]benzoate (3B)* (R = C<sub>10</sub>H<sub>21</sub>, yield 91%, m.p. 79-80 °C), *4-dodecyloxyphenyl 4-[(3-(tert-butyl(dimethyl)silyloxy)cinnamoyl)oxy]benzoate (3C)* (R = C<sub>12</sub>H<sub>25</sub>, yield 90%, m.p. 71-72 °C), and *4-tetradecyloxyphenyl 4-[(3-(tert-butyl(dimethyl)silyloxy)cinnamoyl)oxy]benzoate (3D)* (R = C<sub>14</sub>H<sub>29</sub>, yield 89%, m.p. 60-61 °C) were obtained by the same procedure.

In the same way, the reaction of acid **1** with hydroxy ester **2E** gave rise to ester **3E** with inversed orientation of the linking carboxylic group. *4-[(3-(tert-Butyl(dimethyl)silyloxy)cinnamoyl)oxy]phenyl 4-octyloxybenzoate (3E)*, yield 84%, m.p. 98 °C. <sup>1</sup>H NMR: 0.23 (s, 6 H, (CH<sub>3</sub>)<sub>2</sub>Si), 0.89 (t, 3 H, *J* = 6.9, CH<sub>3</sub>), 1.00 (s, 9 H, (CH<sub>3</sub>)<sub>3</sub>Si), 1.24-1.40 (m, 8 H, (CH<sub>2</sub>)<sub>4</sub>), 1.48 (m, 2 H, CH<sub>2</sub>), 1.83 (m, 2 H, CH<sub>2</sub>), 4.04 (t, 2 H, *J* = 6.5), 6.59 (d, 1 H, *J* = 16.1, CH=CHCOO), 6.91 (ddd, 1 H, <sup>3</sup>*J* = 7.9, <sup>4</sup>*J*<sub>H-4,H-2</sub> = 2.3, <sup>4</sup>*J*<sub>H-4,H-6</sub> = 2.5, H-4), 6.97 (d, 2 H, *J* = 8.8), 7.06 (t, 1 H, *J* = 2.3, H-2), 7.19 (m, 1 H, H-6), 7.23 (d, 4 H, *J* = 1.8), 7.29 (t, 1 H, *J* = 7.9, H-6), 7.82 (d, 1 H, *J* = 16.1, CH=CHCOO), 8.14 (d, 2 H, *J* = 8.8). Elemental analysis: for C<sub>36</sub>H<sub>46</sub>O<sub>6</sub>Si (602.85), calculated C 71.73, H 7.69; found C 71.68, H 7.69%.

*4-Dodecyloxyphenyl 4-[(3-(tert-butyl(dimethyl)silyloxy)cinnamoyl)oxy]benzoate (3F)* (R = C<sub>10</sub>H<sub>21</sub>, yield 91%, m.p. 78 °C), *4-dodecyloxyphenyl 4-[(3-(tert-butyl(dimethyl)silyloxy)cinnamoyl)oxy]benzoate (3G)* (R = C<sub>12</sub>H<sub>25</sub>, yield 84%, m.p. 62 °C), and *4-tetradecyloxyphenyl 4-[(3-(tert-butyl(dimethyl)silyloxy)cinnamoyl)oxy]benzoate (3H)* (R = C<sub>14</sub>H<sub>29</sub>, yield 78%, m.p. 63 °C) were prepared by the above procedure.

In the same way, acylation of hydroxy esters **2I** with acid **1** afforded ester **3I** with an additional ester group in the terminal chain. *Octyl 4-{4-[(3-(tert-butyl(dimethyl)silyloxy)cinnamoyl)oxy]benzoyl}oxy}benzoate (3I)* was purified by column chromatography (hexane/ethyl acetate 10/1), yield 70 %, m.p. 58-59 °C. <sup>1</sup>H NMR: 0.32 (s, 6 H, (CH<sub>3</sub>)<sub>2</sub>Si), 0.89 (t, 3 H, *J* = 6.9, CH<sub>3</sub>), 1.01 (s, 9 H, (CH<sub>3</sub>)<sub>3</sub>Si), 1.20-1.52 (m, 10 H, (CH<sub>2</sub>)<sub>5</sub>), 1.78 (m, 2 H, CH<sub>2</sub>), 4.33 (t, 2 H, *J* = 6.7, COOCH<sub>2</sub>), 6.60 (d, 1 H, *J* = 16.1, CH=CHCOO), 6.93 (dd, 1 H, <sup>3</sup>*J* = 7.9, <sup>4</sup>*J* = 1.8, H-4), 7.07 (bs, 1 H, H-2), 7.20 (d, 1 H, *J* = 7.9, H-6), 7.30 (dd, 1 H, <sup>3</sup>*J* = 7.9, <sup>4</sup>*J* = 2.0, H-5), 7.31 (d, 2 H, *J* = 8.5, 2 H), 7.35 (d, 2 H, *J* =

8.5), 7.85 (d, 1 H,  $J = 16.1$ ,  $\text{CH}=\underline{\text{CH}}\text{COO}$ ), 8.13 (d, 2 H,  $J = 8.5$ ), 8.27 (d, 2 H,  $J = 8.5$ ). Elemental analysis: for  $\text{C}_{37}\text{H}_{46}\text{O}_7\text{Si}$  (630.86), calculated C 70.45, H 7.35; found C 70.43, H 7.38%.

*Decyl 4-{4-([3-(tert-butyl(dimethyl)silyloxy)cinnamoyl]oxy)benzoyl}oxy}benzoate (3J)* ( $\text{R} = \text{C}_{10}\text{H}_{21}$ , yield 87%, m. p. 52.5-53.5 °C), *dodecyl 4-{4-([3-(tert-butyl(dimethyl)silyloxy)cinnamoyl]oxy)benzoyl}oxy}benzoate (3K)* ( $\text{R} = \text{C}_{12}\text{H}_{25}$ , yield 72%, m.p. 53-56 °C), and *tetradecyl 4-{4-([3-(tert-butyl(dimethyl)silyloxy)cinnamoyl]oxy)benzoyl}oxy}benzoate (3L)* ( $\text{R} = \text{C}_{14}\text{H}_{29}$ , yield 76%, m.p. 67-69 °C) were synthesized analogously.

#### 4-Alkyloxyphenyl 4-[(3-hydroxycinnamoyl)oxy]benzoate (4A-D)

To a solution of **3A-D** (1.00 mmol) in wet THF (30 ml, 1%  $\text{H}_2\text{O}$ ), tetrabutylammonium fluoride (0.08 g; 0.25 mmol) was added and the reaction mixture was stirred at room temperature for 1 h. Then it was poured into water (50 ml) and washed with ethyl acetate ( $2 \times 50$  ml). The collected organic solution was washed with water (20 ml), saturated solution of NaCl (20 ml) and dried with anhydrous magnesium sulphate. The solvent was removed and the crude product was purified by column chromatography (hexane/ethyl acetate, 4/1) and crystallization from ethanol.

*4-Octyloxyphenyl 4-[(3-hydroxycinnamoyl)oxy]benzoate (4A)*, yield 74%, m.p. 134-137 °C.  $^1\text{H}$  NMR: 0.89 (t, 3 H,  $J = 6.9$ ,  $\text{CH}_3$ ), 1.25-1.39 (m, 8 H,  $(\text{CH}_2)_4$ ), 1.47 (m, 2 H,  $\text{CH}_2$ ), 1.79 (m, 2 H,  $\text{CH}_2$ ), 3.96 (t, 2 H,  $J = 6.6$ ,  $\text{OCH}_2$ ), 4.84 (s, 1 H, OH), 6.61 (d, 1 H,  $J = 16.1$ ,  $\text{CH}=\underline{\text{CH}}\text{COO}$ ), 6.92 (m, 3 H, 2H + H-4), 7.07 (t, 1 H,  $J = 2.1$ , H-2), 7.11 (d, 2 H,  $J = 9.1$ ), 7.18 (m, 1 H, H-6), 7.31 (t, 1 H,  $J = 7.9$ , H-5), 7.32 (d, 2 H,  $J = 8.8$ ), 7.84 (d, 1 H,  $J = 16.1$ ,  $\text{CH}=\underline{\text{CH}}\text{COO}$ ), 8.26 (d, 2 H,  $J = 8.8$ ). Elemental analysis: for  $\text{C}_{30}\text{H}_{32}\text{O}_6$  (488.59), calculated C 73.75, H 6.60; found C 73.79, H 6.56%.

In the same way, *4-decyloxyphenyl 4-[(3-hydroxycinnamoyl)oxy]benzoate (4B)* ( $\text{R} = \text{C}_{10}\text{H}_{21}$ , yield 59%, m.p. 131-134 °C), *4-dodecyloxyphenyl 4-[(3-hydroxycinnamoyl)oxy]benzoate (4C)* ( $\text{R} = \text{C}_{12}\text{H}_{25}$ , yield 61%, m.p. 121-125 °C), and *4-tetradecyloxyphenyl 4-[(3-hydroxycinnamoyl)oxy]benzoate (4D)* ( $\text{R} = \text{C}_{14}\text{H}_{29}$ , yield 58%, m.p. 120-124 °C) were prepared.

Deprotection of silyl derivatives **3E-H** yielded the corresponding hydroxy esters **4E-H**.

*4-[(3-Hydroxycinnamoyl)oxy]phenyl 4-octyloxybenzoate (4E)*, yield 90%, m.p. 122 °C.  $^1\text{H}$  NMR: 0.90 (t, 3 H,  $J = 6.9$ ,  $\text{CH}_3$ ), 1.25-1.40 (m, 8 H,  $(\text{CH}_2)_4$ ), 1.48 (m, 2 H,  $\text{CH}_2$ ), 1.83 (m, 2 H,  $\text{CH}_2$ ), 4.05 (t, 2 H,  $J = 6.6$ ,  $\text{OCH}_2$ ), 4.94 (s, 1 H, OH), 6.59 (d, 1 H,  $J = 16.1$ ,  $\text{CH}=\underline{\text{CH}}\text{COO}$ ), 6.90 (dd, 1 H,  $^3J = 7.9$ ,  $^4J = 2.5$ , H-4), 6.97 (d, 2 H,  $J = 8.8$ ), 7.05 (bs, 1 H, H-2), 7.17 (d, 1 H,  $J = 7.9$ , H-6), 7.23 (d, 4 H,  $J = 1.2$ ), 7.30 (t, 1 H,  $J = 7.9$ , H-5), 7.81 (d, 1 H,  $J = 16.1$ ,  $\text{CH}=\underline{\text{CH}}\text{COO}$ ), 8.14 (d, 2 H,  $J = 8.8$ ). Elemental analysis: for  $\text{C}_{30}\text{H}_{32}\text{O}_6$  (488.59), calculated C 73.75, H 6.60; found C 73.74, H 6.54%.

*4-[(3-Hydroxycinnamoyl)oxy]phenyl 4-decyloxybenzoate (4F)* ( $\text{R} = \text{C}_{10}\text{H}_{21}$ , yield 82%, m.p. 121 °C), *4-[(3-hydroxycinnamoyl)oxy]phenyl 4-dodecyloxybenzoate (4G)* ( $\text{R} = \text{C}_{12}\text{H}_{25}$ , yield 86%, m.p. 122 °C), and *4-[(3-hydroxycinnamoyl)oxy]phenyl 4-tetradecyloxybenzoate (4H)* ( $\text{R} = \text{C}_{14}\text{H}_{29}$ , yield 76%, m.p. 121 °C) were also prepared by the same procedure.

### Alkyl 4-{4-[[[(3-hydroxycinnamoyl)oxy]benzoyl]oxy]benzoate (4I-L)

To a solution of **3I-L** (1.12 mmol) in a mixture of THF (140 ml) and H<sub>2</sub>O (35 ml), tetrabutylammonium fluoride (0.09 g; 0.28 mmol) was added and the reaction mixture was stirred at room temperature for 24 h. Then it was poured into water (200 ml) and washed with ethyl acetate (3 × 100 ml). The collected organic solution was washed with water (120 ml), saturated solution of NaCl (120 ml) and dried with anhydrous magnesium sulphate. The solvent was removed and the crude product was purified by column chromatography (toluene/*tert*-butyl methyl ether, 12/1).

*Octyl 4-{4-[[[(3-hydroxycinnamoyl)oxy]benzoyl]oxy]benzoate (4I)*, yield 58%, m.p. 127 °C. <sup>1</sup>H NMR: 0.89 (t, 3 H, *J* = 6.9, CH<sub>3</sub>), 1.24-1.53 (m, 10 H, (CH<sub>2</sub>)<sub>5</sub>), 1.78 (m, 2 H, CH<sub>2</sub>), 4.33 (t, 2 H, *J* = 6.7, OCH<sub>2</sub>), 5.08 (s, 1 H, OH), 6.60 (d, 1 H, *J* = 16.1, CH=CHCOO), 6.92 (dd, 1 H, <sup>3</sup>*J* = 7.9, <sup>4</sup>*J* = 2.6, H-4), 7.07 (bs, 1 H, H-2), 7.18 (d, 1 H, *J* = 8.2, H-6), 7.30 (d, 2 H, *J* = 8.5, 2 H), 7.31 (dd, 1 H, <sup>3</sup>*J* = 7.9, <sup>4</sup>*J* = 2.6, H-5), 7.35 (d, 2 H, *J* = 8.5), 7.85 (d, 1 H, *J* = 16.1, CH=CHCOO), 8.14 (d, 2 H, *J* = 8.5), 8.27 (d, 2 H, *J*=8.5). Elemental analysis: for C<sub>31</sub>H<sub>32</sub>O<sub>7</sub> (516.60), calculated C 72.08, H 6.24; found C 71.99, H 6.23%.

Analogously, *decyl 4-{4-[[[(3-hydroxycinnamoyl)oxy]benzoyl]oxy]benzoate (4J)* (R = C<sub>10</sub>H<sub>21</sub>, yield 59%, m. p. 130 °C), *dodecyl 4-{4-[[[(3-hydroxycinnamoyl)oxy]benzoyl]oxy]benzoate (4K)* (R = C<sub>12</sub>H<sub>25</sub>, yield 51%, m.p. 123 °C), and *tetradecyl 4-{4-[[[(3-hydroxycinnamoyl)oxy]benzoyl]oxy]benzoate (4L)* (R = C<sub>14</sub>H<sub>29</sub>, yield 76%, m.p. 124 °C) were prepared.

### S1.3 Synthesis of the target materials I-III

#### 4-Octyloxyphenyl 4-{(3-[4-(((4-octyloxybenzoyl)oxy)benzoyl]oxy)cinnamoyl)oxy}-benzoate (Ia)

The acid chloride **5A** was prepared from the corresponding 4-[(4-octyloxybenzoyl)oxy]benzoic acid (0.10 g; 0.27 mmol), thionyl chloride (0.2 ml; 2.8 mmol) and pyridine (0.25 ml; 3.1 mmol) in dry toluene (15 ml). The reaction mixture was stirred and heated to boiling for 2 h. The solvent and unreacted thionyl chloride were evaporated and the residue dried at reduced pressure. The crude acid chloride was dissolved in dry dichloromethane (5 ml) and added to a solution of hydroxy ester **4A** (0.12 g; 0.25 mmol) and DMAP (0.04 g; 0.33 mmol) in dry dichloromethane (20 ml). The reaction mixture was stirred at room temperature for 0.5 h and then decomposed with 1% aq. HCl (50 ml). Layers were separated and the aqueous layer was washed with dichloromethane (2 × 30 ml). The collected organic solution was washed with water (20 ml), saturated solution of NaCl (20 ml) and dried with anhydrous magnesium sulphate. The solvent was removed and the crude product was purified by column chromatography (1% methanol in chloroform). 0.16 g (76%) of **Ia** was obtained. <sup>1</sup>H NMR: 0.89 (t, 6 H, *J* = 6.9, 2 × CH<sub>3</sub>), 1.30 (m, 16 H, 2 × (CH<sub>2</sub>)<sub>4</sub>), 1.46 (m, 4 H, 2 × CH<sub>2</sub>), 1.81 (m, 4 H, 2 × CH<sub>2</sub>), 3.96 (t, 2 H, *J* = 6.7, OCH<sub>2</sub>), 4.06 (t, 2 H, *J* = 6.5, CH<sub>2</sub>O), 6.67 (d, 1 H, *J* = 16.1, CH=CHCOO), 6.93 (d, 2 H, *J* = 9.1), 6.99 (d, 2 H, *J* = 8.8), 7.11 (d, 2 H, *J* = 9.1), 7.33 (m, 3 H, 2 H + H-4), 7.40 (d, 2 H, *J* = 8.8), 7.51 (m, 3 H, H-2, H-5, H-6), 7.91 (d, 1 H, *J* = 16.1, CH=CHCOO), 8.16 (d, 2 H, *J* = 8.8, 2 H), 8.26 (d, 2 H, *J* = 8.8, 2 H), 8.30 (d, 2 H, *J* = 8.8, 2 H). Elemental analysis: for C<sub>52</sub>H<sub>56</sub>O<sub>10</sub> (841.02), calculated C 74.26, H 6.71; found C 74.43, H 6.67%.

Employing the same synthetic strategy, the other compounds of series **I** were prepared.

**4-Decyloxyphenyl 4-[(3-[4-(((4-decyloxybenzoyl)oxy)benzoyl)oxy]cinnamoyl)oxy]benzoate (Ib).** Yield 74%. <sup>1</sup>H NMR: 0.89 (t, 6 H, *J* = 6.9, 2 × CH<sub>3</sub>), 1.28 (m, 24 H, 2 × (CH<sub>2</sub>)<sub>6</sub>), 1.46 (m, 4 H, 2 × CH<sub>2</sub>), 1.81 (m, 4 H, 2 × CH<sub>2</sub>), 3.96 (t, 2 H, *J* = 6.7, OCH<sub>2</sub>), 4.06 (t, 2 H, *J* = 6.5, CH<sub>2</sub>O), 6.67 (d, 1 H, *J* = 16.1, CH=CHCOO), 6.93 (d, 2 H, *J* = 9.1), 6.99 (d, 2 H, *J* = 8.8), 7.11 (d, 2 H, *J* = 9.1), 7.33 (m, 3 H, 2 H + H-4), 7.40 (d, 2 H, *J* = 8.8), 7.51 (m, 3 H, H-2,H-5,H-6), 7.91 (d, 1 H, *J* = 16.1, CH=CHCOO), 8.16 (d, 2 H, *J* = 8.8), 8.26 (d, 2 H, *J* = 8.8), 8.30 (d, 2 H, *J* = 8.8). Elemental analysis: for C<sub>56</sub>H<sub>64</sub>O<sub>10</sub> (897.13), calculated C 74.98, H 7.19; found C 75.05, H 7.11%.

**4-Dodecyloxyphenyl 4-[(3-[4-(((4-dodecyloxybenzoyl)oxy)benzoyl)oxy]cinnamoyl)oxy]benzoate (Ic).** Yield 65%. <sup>1</sup>H NMR: 0.89 (t, 6 H, *J* = 6.9, 2 × CH<sub>3</sub>), 1.29 (m, 32 H, 2 × (CH<sub>2</sub>)<sub>8</sub>), 1.46 (m, 4 H, 2 × CH<sub>2</sub>), 1.81 (m, 4 H, 2 × CH<sub>2</sub>), 3.96 (t, 2 H, *J* = 6.7, OCH<sub>2</sub>), 4.06 (t, 2 H, *J* = 6.5, CH<sub>2</sub>O), 6.67 (d, 1 H, *J* = 16.1, CH=CHCOO), 6.93 (d, 2 H, *J* = 9.1), 6.99 (d, 2 H, *J* = 8.8), 7.11 (d, 2 H, *J* = 9.1), 7.33 (m, 3 H, 2 H + H-4), 7.40 (d, 2 H, *J* = 8.8), 7.51 (m, 3 H, H-2,H-5,H-6), 7.91 (d, 1 H, *J* = 16.1, CH=CHCOO), 8.16 (d, 2 H, *J* = 8.8), 8.26 (d, 2 H, *J* = 8.8), 8.30 (d, 2 H, *J* = 8.8). Elemental analysis: for C<sub>60</sub>H<sub>72</sub>O<sub>10</sub> (953.24), calculated C 75.60, H 7.61; found C 75.58, H 7.66%.

**4-Tetradecyloxyphenyl 4-[(3-[4-(((4-tetradecyloxybenzoyl)oxy)benzoyl)oxy]cinnamoyl)oxy]benzoate (Id).** Yield 70%. <sup>1</sup>H NMR: 0.88 (t, 6 H, *J* = 6.9, 2 × CH<sub>3</sub>), 1.27 (m, 40 H, 2 × (CH<sub>2</sub>)<sub>10</sub>), 1.46 (m, 4 H, 2 × CH<sub>2</sub>), 1.81 (m, 4 H, 2 × CH<sub>2</sub>), 3.96 (t, 2 H, *J* = 6.7, OCH<sub>2</sub>), 4.06 (t, 2 H, *J* = 6.5, CH<sub>2</sub>O), 6.67 (d, 1 H, *J* = 16.1, CH=CHCOO), 6.93 (d, 2 H, *J* = 9.1), 6.99 (d, 2 H, *J* = 8.8), 7.11 (d, 2 H, *J* = 9.1), 7.33 (m, 3 H, 2 H + H-4), 7.40 (d, 2 H, *J* = 8.8), 7.51 (m, 3 H, H-2,H-5,H-6), 7.91 (d, 1 H, *J* = 16.1, CH=CHCOO), 8.16 (d, 2 H, *J* = 8.8), 8.26 (d, 2 H, *J* = 8.8), 8.30 (d, 2 H, *J* = 8.8). Elemental analysis: for C<sub>64</sub>H<sub>80</sub>O<sub>10</sub> (1009.35), calculated C 76.16, H 7.99; found C 76.10, H 7.97%.

#### **4-[3-(4-(4-Alkyloxybenzoyloxy)benzoyloxy)cinnamoyloxy]phenyl 4-alkyloxybenzoate (IIa-d)**

By the same procedure as for **Ia-d**, acylation of hydroxy esters **4E-H** with acid chlorides **5A-D** yielded crude compounds **IIa-IId**, which were purified by column chromatography (1% methanol in CHCl<sub>3</sub>) and subsequent crystallization.

**4-[(3-[4-((4-Octyloxybenzoyl)oxy)benzoyl)oxy]cinnamoyl)oxy]phenyl 4-octyloxybenzoate (IIa).** Yield 50%. <sup>1</sup>H NMR: 0.89 (t, 6 H, *J* = 6.9, 2 × CH<sub>3</sub>), 1.25-1.42 (m, 16 H, 2 × (CH<sub>2</sub>)<sub>4</sub>), 1.46 (m, 4 H, 2 × CH<sub>2</sub>), 1.81 (m, 4 H, 2 × CH<sub>2</sub>), 4.08 (m, 4 H, 2 × CH<sub>2</sub>O), 6.67 (d, 1 H, *J* = 16.1, CH=CHCOO), 6.97 (d, 2 H, *J* = 8.8), 6.99 (d, 2 H, *J* = 9.1), 7.24 (bs, 4 H), 7.31 (m, 1 H, H-4), 7.39 (d, 2 H, *J* = 8.8), 7.50 (m, 3 H, H-2,H-5,H-6), 7.89 (d, 1 H, *J* = 16.1, CH=CHCOO), 8.14 (d, 2 H, *J* = 8.8), 8.16 (d, 2 H, *J* = 8.8), 8.29 (d, 2 H, *J* = 8.8). Elemental analysis: for C<sub>52</sub>H<sub>56</sub>O<sub>10</sub> (841.02), calculated C 74.26, H 6.71; found C 74.32, H 6.73%.

**4-[(3-[4-((4-Decyloxybenzoyl)oxy)benzoyl)oxy]cinnamoyl)oxy]phenyl 4-decyloxybenzoate (IIb).** Yield 78%. <sup>1</sup>H NMR: 0.89 (t, 6 H, *J* = 6.9, 2 × CH<sub>3</sub>), 1.23-1.41 (m, 24 H, 2 × (CH<sub>2</sub>)<sub>6</sub>), 1.48 (m, 4 H, 2 × CH<sub>2</sub>), 1.83 (m, 4 H, 2 × CH<sub>2</sub>), 4.06 (m, 4 H, 2 × CH<sub>2</sub>O), 6.67 (d, 1 H, *J* = 16.1, CH=CHCOO), 6.97 (d, 2 H, *J* = 8.8), 6.99 (d, 2 H, *J* = 8.8), 7.24 (bs, 4 H), 7.31 (m, 1 H, H-4), 7.39 (d, 2 H, *J* = 8.8), 7.50 (m, 3 H, H-2,H-5,H-6), 7.89 (d, 1 H, *J* = 16.1,



CH=CHCOO), 8.14 (d, 2 H,  $J = 8.8$ ), 8.16 (d, 2 H,  $J = 8.8$ ), 8.29 (d, 2 H,  $J = 8.8$ ). Elemental analysis: for C<sub>56</sub>H<sub>64</sub>O<sub>10</sub> (897.13), calculated C 74.98, H 7.19; found C 74.93, H 7.16%.

**4-[(3-[(4-((4-Dodecyloxybenzoyl)oxy)benzoyl)oxy]cinnamoyl)oxy]phenyl 4-dodecyloxybenzoate (IIc).** Yield 59%. <sup>1</sup>H NMR: 0.89 (t, 6 H,  $J = 6.9$ , 2 × CH<sub>3</sub>), 1.28 (m, 32 H, 2 × (CH<sub>2</sub>)<sub>8</sub>), 1.48 (m, 4 H, 2 × CH<sub>2</sub>), 1.83 (m, 4 H, 2 × CH<sub>2</sub>), 4.06 (m, 4 H, 2 × CH<sub>2</sub>O), 6.67 (d, 1 H,  $J = 16.1$ , CH=CHCOO), 6.97 (d, 2 H,  $J = 8.8$ ), 6.99 (d, 2 H,  $J = 8.8$ ), 7.24 (bs, 4 H), 7.31 (m, 1 H, H-4), 7.39 (d, 2 H,  $J = 8.8$ ), 7.50 (m, 3 H, H-2,H-5,H-6), 7.89 (d, 1 H,  $J = 16.1$ , CH=CHCOO), 8.14 (d, 2 H,  $J = 8.8$ ), 8.16 (d, 2 H,  $J = 8.8$ ), 8.29 (d, 2 H,  $J = 8.8$ ). Elemental analysis: for C<sub>60</sub>H<sub>72</sub>O<sub>10</sub> (953.24), calculated C 75.60, H 7.61; found C 75.66, H 7.57%.

**4-[(3-[(4-((4-Tetradecyloxybenzoyl)oxy)benzoyl)oxy]cinnamoyl)oxy]phenyl 4-tetradecyloxybenzoate (IId).** Yield 73%. <sup>1</sup>H NMR: 0.88 (t, 6 H,  $J = 6.9$ , 2 × CH<sub>3</sub>), 1.30 (m, 40 H, 2 × (CH<sub>2</sub>)<sub>10</sub>), 1.48 (m, 4 H, 2 × CH<sub>2</sub>), 1.83 (m, 4 H, 2 × CH<sub>2</sub>), 4.06 (m, 4 H, 2 × CH<sub>2</sub>O), 6.67 (d, 1 H,  $J = 16.1$ , CH=CHCOO), 6.97 (d, 2 H,  $J = 8.8$ ), 6.99 (d, 2 H,  $J = 8.8$ ), 7.24 (bs, 4 H), 7.31 (m, 1 H, H-4), 7.39 (d, 2 H,  $J = 8.8$ ), 7.50 (m, 3 H, H-2,H-5,H-6), 7.89 (d, 1 H,  $J = 16.1$ , CH=CHCOO), 8.14 (d, 2 H,  $J = 8.8$ ), 8.16 (d, 2 H,  $J = 8.8$ ), 8.29 (d, 2 H,  $J = 8.8$ ). Elemental analysis: for C<sub>64</sub>H<sub>80</sub>O<sub>10</sub> (1009.35), calculated C 76.16, H 7.99; found C 76.13, H 8.01%.

### Octyl 4-{4-(3-[4-(4-octyloxybenzoyloxy)benzoyloxy]cinnamoyloxy)benzoyloxy}benzoate (IIIa)

The acid chloride **5A** was prepared from the corresponding 4-[(4-octyloxybenzoyl)oxy]benzoic acid (0.20 g; 0.54 mmol), thionyl chloride (0.2 ml; 2.8 mmol) and pyridine (0.25 ml; 3.1 mmol) in dry toluene (20 ml). The reaction mixture was stirred and heated to boiling for 2 h. The solvent and unreacted thionyl chloride were evaporated and the residue dried at reduced pressure. The crude acid chloride was dissolved in dry toluene (5 ml) and added to a solution of hydroxy ester **4I** (0.12 g; 0.22 mmol) and DMAP (0.06 g; 0.51 mmol) in dry hot toluene (20 ml) under stirring. After cooling to room temperature, the mixture was decomposed with water (30 ml). Layers were separated and the aqueous layer was washed with chloroform (3×25 ml). The collected organic solution was washed with water (40 ml) and dried with anhydrous magnesium sulphate. The solvent was removed and the crude product was purified by column chromatography (toluene/*tert*-butyl methyl ether, 18/1). 0.13 g (69%) of **IIIa** was obtained. <sup>1</sup>H NMR: 0.90 (t, 6 H,  $J = 6.9$ , 2 × CH<sub>3</sub>), 1.23-1.54 (m, 20 H, 2 × (CH<sub>2</sub>)<sub>5</sub>), 1.81 (m, 4 H, 2 × CH<sub>2</sub>), 4.06 (t, 2 H,  $J = 6.7$ , CH<sub>2</sub>O), 4.33 (t, 2 H,  $J = 6.7$ , COOCH<sub>2</sub>), 6.67 (d, 1 H,  $J = 15.8$ , CH=CHCOO), 6.99 (d, 2 H,  $J = 8.8$ ), 7.32 (m, 3 H, Ar-H, H-4), 7.36 (d, 2 H,  $J = 8.8$ ), 7.39 (d, 2 H,  $J = 8.8$ ), 7.51 (m, 3 H, H-2,H-5,H-6), 7.92 (d, 1 H,  $J = 16.1$ , CH=CHCOO), 8.13 (d, 2 H,  $J = 8.8$ ), 8.16 (d, 2 H,  $J = 8.8$ ), 8.27 (d, 2 H,  $J = 8.8$ ), 8.30 (d, 2 H,  $J = 8.8$ ). Elemental analysis: for C<sub>53</sub>H<sub>56</sub>O<sub>11</sub> (869.03), calculated C 73.25, H 6.50; found C 73.26, H 6.46%.

Analogously, the other compounds of the series **III** were prepared.

**Decyl 4-{4-(3-[4-(4-decyloxybenzoyloxy)benzoyloxy]cinnamoyloxy)benzoyloxy}benzoate (IIIf).** Yield 47%. <sup>1</sup>H NMR: 0.89 (t, 6 H,  $J = 6.9$ , 2 × CH<sub>3</sub>), 1.18-1.51 (m, 28 H, 2 × (CH<sub>2</sub>)<sub>7</sub>), 1.81 (m, 4 H, 2 × CH<sub>2</sub>), 4.06 (t, 2 H,  $J = 6.7$ , CH<sub>2</sub>O), 4.33 (t, 2 H,  $J = 6.7$ , COOCH<sub>2</sub>), 6.67 (d, 1 H,  $J = 15.8$ , CH=CHCOO), 6.99 (d, 2 H,  $J = 8.8$ ), 7.31 (m, 3 H, Ar-H, H-4), 7.36 (d, 2 H,  $J$

= 8.8), 7.39 (d, 2 H,  $J = 8.8$ ), 7.51 (m, 3 H, H-2,H-5,H-6), 7.92 (d, 1 H,  $J = 16.1$ , CH=CHCOO), 8.14 (d, 2 H,  $J = 8.8$ ), 8.16 (d, 2 H,  $J = 8.8$ ), 8.27 (d, 2 H,  $J = 8.8$ ), 8.29 (d, 2 H,  $J = 8.8$ ). Elemental analysis: for  $C_{57}H_{64}O_{11}$  (925.14), calculated C 74.00, H 6.97; found C 73.95, H 7.00%.

**Dodecyl 4-{4-(3-[4-(4-dodecyloxybenzoyloxy)benzoyloxy]cinnamoyloxy)benzoyloxy}-benzoate (IIIc).** Yield 48%.  $^1H$  NMR: 0.88 (t, 6 H,  $J = 6.9$ ,  $2 \times CH_3$ ), 1.19-1.52 (m, 36 H,  $2 \times (CH_2)_9$ ), 1.80 (m, 4 H,  $2 \times CH_2$ ), 4.06 (t, 2 H,  $J = 6.7$ ,  $CH_2O$ ), 4.33 (t, 2 H,  $J = 6.7$ ,  $COOCH_2$ ), 6.67 (d, 1 H,  $J = 15.8$ , CH=CHCOO), 6.99 (d, 2 H,  $J = 8.8$ ), 7.32 (m, 3 H, Ar-H, H-4), 7.36 (d, 2 H,  $J = 8.8$ ), 7.39 (d, 2 H,  $J = 9.1$ ), 7.51 (m, 3 H, H-2,H-5,H-6), 7.92 (d, 1 H,  $J = 16.1$ , CH=CHCOO), 8.13 (d, 2 H,  $J = 8.8$ ), 8.16 (d, 2 H,  $J = 8.8$ ), 8.27 (d, 2 H,  $J = 8.8$ ), 8.30 (d, 2 H,  $J = 8.8$ ). Elemental analysis: for  $C_{61}H_{72}O_{11}$  (981.25), calculated C 74.67, H 7.40; found C 74.70, H 7.40%.

**Tetradecyl 4-{4-(3-[4-(4-tetradecyloxybenzoyloxy)benzoyloxy]cinnamoyloxy)benzoyloxy}benzoate (IIIId).** Yield 46%.  $^1H$  NMR: 0.88 (t, 6 H,  $J = 6.9$ ,  $2 \times CH_3$ ), 1.22-1.52 (m, 44 H,  $2 \times (CH_2)_{11}$ ), 1.81 (m, 4 H,  $2 \times CH_2$ ), 4.06 (t, 2 H,  $J = 6.7$ ,  $CH_2O$ ), 4.33 (t, 2 H,  $J = 6.7$ ,  $COOCH_2$ ), 6.67 (d, 1 H,  $J = 15.8$ , CH=CHCOO), 6.99 (d, 2 H,  $J = 8.8$ ), 7.32 (m, 3 H, Ar-H, H-4), 7.36 (d, 2 H,  $J = 8.8$ ), 7.40 (d, 2 H,  $J = 8.8$ ), 7.51 (m, 3 H, H-2,H-5,H-6), 7.92 (d, 1 H,  $J = 16.1$ , CH=CHCOO), 8.14 (d, 2 H,  $J = 8.8$ ), 8.16 (d, 2 H,  $J = 8.8$ ), 8.27 (d, 2 H,  $J = 8.8$ ), 8.30 (d, 2 H,  $J = 8.8$ ). Elemental analysis: for  $C_{65}H_{80}O_{11}$  (1037.36), calculated C 75.26, H 7.77; found C 75.27, H 7.75%.

## S2. Experimental results

### S2.1 Mesomorphic properties of intermediates

We have found some intermediates exhibit mesomorphic properties. Namely, we characterized silyl derivatives **3E-3H** and hydroxy derivatives **4E-4L**, which exhibit calamitic mesophases. For the mostly observed nematic phase (N) typical mosaic or schlieren-like textures were observed in the polarizing microscope. In the smectic phases fan-type textures have been found. Temperatures were detected by DSC measurements and are summarized with corresponding enthalpy changes at phase transitions in Table S1. The planar texture of **3G** is presented in Fig. S1.

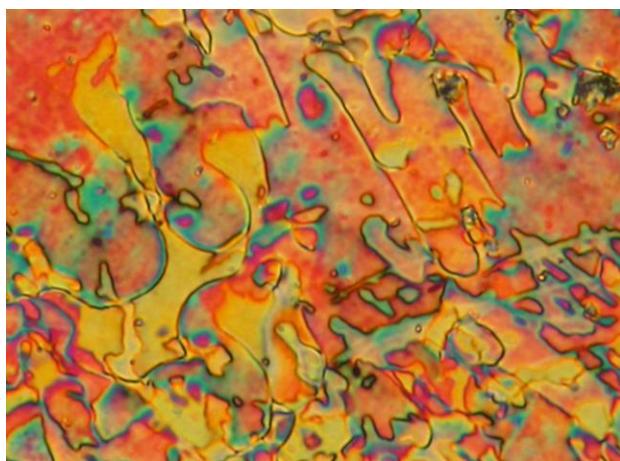

**Fig.S1**

The planar texture of **3G** in the nematic phase. Width of the figure corresponds to 150  $\mu\text{m}$ .

**Table S1**

For intermediates the phase transition temperatures,  $T_{\text{tr}}$ , melting points, m.p., and corresponding enthalpies,  $\Delta H$ , indicated on second heating and cooling runs at a rate 5K/min. Enthalpies are presented in brackets in kJ/mol. Observed mesophases are indicated.

| Comp.     | R                            | m. p. ( $\Delta H$ ) | $T_{\text{cr}}$ ( $\Delta H$ ) | <b>SmC</b> | $T_{\text{tr}}$ ( $\Delta H$ ) | <b>SmA</b> | $T_{\text{tr}}$ ( $\Delta H$ ) | <b>N</b> | $T_{\text{tr}}$ ( $\Delta H$ ) | <b>Iso</b> |
|-----------|------------------------------|----------------------|--------------------------------|------------|--------------------------------|------------|--------------------------------|----------|--------------------------------|------------|
| <b>3E</b> | $\text{C}_8\text{H}_{17}$    | 98<br>(+27.2)        | 60<br>(-26.5)                  | -          |                                | -          |                                | •        | 68<br>(-0.53)                  | •          |
| <b>3F</b> | $\text{C}_{10}\text{H}_{21}$ | 78<br>(+32.3)        | 50<br>(-24.8)                  | -          |                                | -          |                                | •        | 69<br>(-0.57)                  | •          |
| <b>3G</b> | $\text{C}_{12}\text{H}_{25}$ | 62<br>(+26.0)        | 49<br>(-23.0)                  | -          |                                | -          |                                | •        | 61<br>(-0.61)                  | •          |
| <b>3H</b> | $\text{C}_{14}\text{H}_{29}$ | 63<br>(+37.8)        | 22<br>(-10.6)                  | •          | 47<br>(-2.5)                   | -          |                                | •        | 60<br>(-0.82)                  | •          |
| <b>4E</b> | $\text{C}_8\text{H}_{17}$    | 122<br>(+28.5)       | 88<br>(-23.8)                  | -          |                                | -          |                                | •        | 167<br>(-1.30)                 | •          |
| <b>4F</b> | $\text{C}_{10}\text{H}_{21}$ | 121<br>(+28.0)       | 102<br>(-27.4)                 | -          |                                | -          |                                | •        | 161<br>(-1.45)                 | •          |
| <b>4G</b> | $\text{C}_{12}\text{H}_{25}$ | 122<br>(+25.7)       | 101<br>(-25.2)                 | -          |                                | -          |                                | •        | 159<br>(-1.44)                 | •          |
| <b>4H</b> | $\text{C}_{14}\text{H}_{29}$ | 121<br>(+34.3)       | 109<br>(-32.3)                 | •          | 140<br>(-0.29)                 | -          |                                | •        | 156<br>(-2.02)                 | •          |
| <b>4I</b> | $\text{C}_8\text{H}_{17}$    | 127<br>(+34.9)       | 100<br>(-34.5)                 | -          |                                | -          |                                | •        | 118<br>(-0.29)                 | •          |
| <b>4J</b> | $\text{C}_{10}\text{H}_{21}$ | 130<br>(+46.1)       | 109<br>(-46.9)                 | -          |                                | -          |                                | •        | 119<br>(-0.48)                 | •          |
| <b>4K</b> | $\text{C}_{12}\text{H}_{25}$ | 123<br>(+47.5)       | 97<br>(-38.9)                  | -          |                                | •          | 120<br>(-1.8)                  | -        |                                | •          |
| <b>4L</b> | $\text{C}_{14}\text{H}_{29}$ | 124<br>(+45.6)       | 102<br>(-41.7)                 | -          |                                | •          | 120<br>(-1.9)                  | -        |                                | •          |



## S2.1 Dielectric spectroscopy measurements

Dielectric properties were studied using Schlumberger 1260 impedance analyser. The frequency dispersions were measured on cooling at a rate of about 0.2 K/min, keeping the temperature of the sample stable during the frequency sweeps in the range of 10 Hz ÷ 10 MHz. The frequency dispersion data were analyzed using the Cole-Cole formula (1) in a generalized form. For the frequency dependent complex permittivity  $\varepsilon^*(f) = \varepsilon' - i\varepsilon''$  we have utilized:

$$\varepsilon^* - \varepsilon_\infty = \frac{\Delta\varepsilon}{1 + (if/f_r)^{(1-\alpha)}} - i\left(\frac{\sigma}{2\pi\varepsilon_0 f^n} + Af^m\right) \quad (1),$$

where  $f_r$  is the relaxation frequency,  $\Delta\varepsilon$  is the dielectric strength,  $\alpha$  is the distribution parameter of the relaxation,  $\varepsilon_0$  is the permittivity of a vacuum,  $\varepsilon_\infty$  is the high frequency permittivity and  $n, m, A$  are the parameters of fitting. The second and the third terms in the equation are used to eliminate a low frequency contribution from d.c. conductivity  $\sigma$  and a high frequency contribution due to the resistance of the electrodes, respectively. Due to the gold electrodes the contribution of the third term was negligible for the frequencies up to 1 MHz. Measured values of real,  $\varepsilon'$ , and imaginary,  $\varepsilon''$ , parts of the dielectric permittivity  $\varepsilon^*(f) = \varepsilon' - i\varepsilon''$  were simultaneously fitted to formula (1). The results of the fitting procedure for **IId** are shown in Fig. S2, where the temperature dependences of  $\Delta\varepsilon$  and  $f_r$  are presented in the temperature ranges of both mesophases.

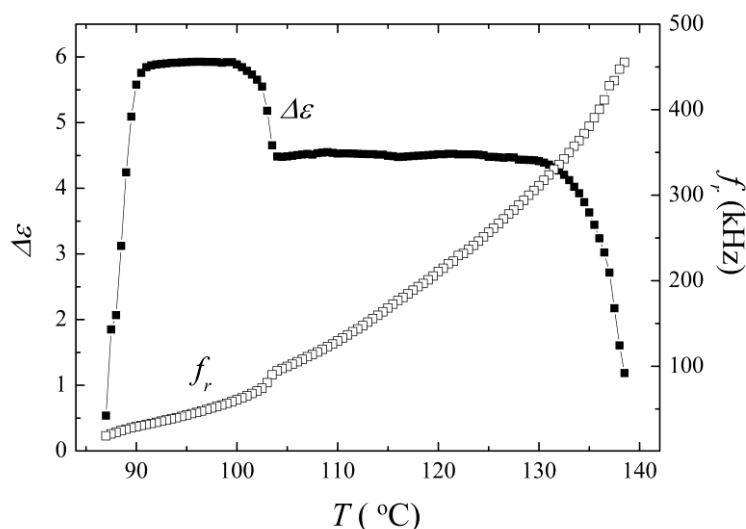

**Fig. S2**

Temperature dependence for the fitted values of the relaxation frequency,  $f_r$ , and the dielectric strength,  $\Delta\varepsilon$ , for **IId**.

### S2.3. X-ray analysis

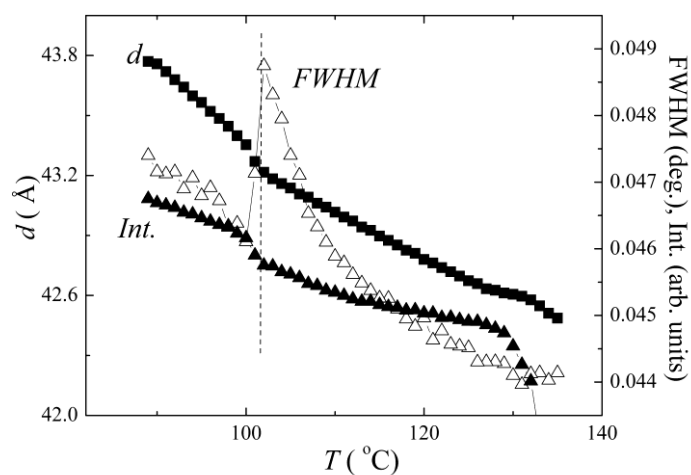

**Fig. S3**

For **IIId** the temperature dependence of the layer spacing,  $d$ , in the  $B_2$  and  $B_5$  mesophases taken on cooling from the isotropic phase. The  $B_2$ - $B_5$  phase transition is marked by the dashed line. From the right side the intensity, *Int.*, and the full-width at a half maximum, *FWHM*, of the x-ray signal is presented.

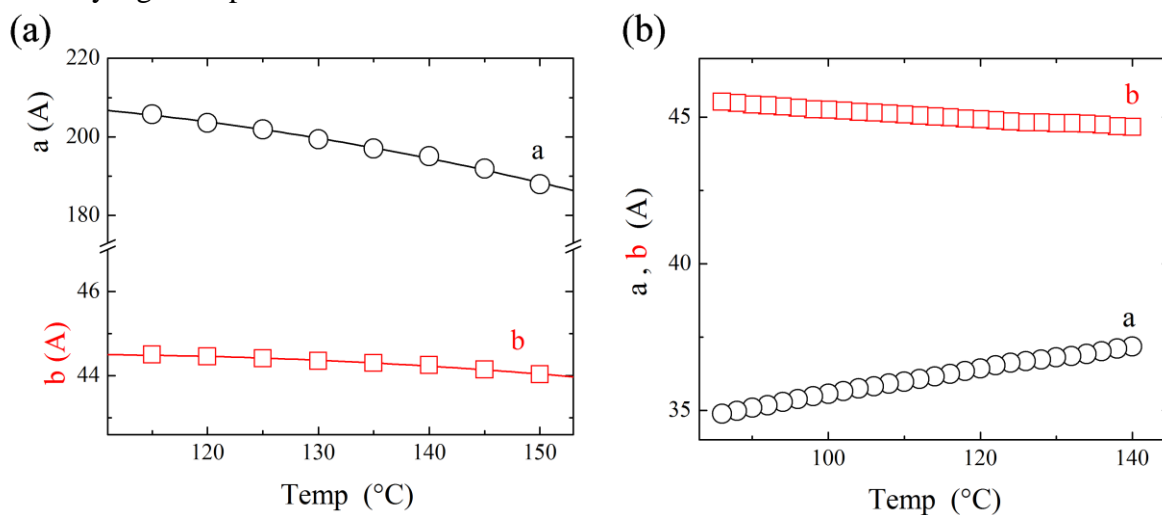

**Fig. S4**

Temperature evolution of the unit cell dimensions ( $a$  is the molecular block width and  $b$  is the layer fragment thickness) for compounds (a) **Ia** in the  $B_{1Rev}$  phase and (b) **IIa** in the  $B_1$  phase.
